# Supplementary material
Source: JCI journal article supplement (doi:10.1172/jci198687)
Supplement: sd4 [file 4]

## Supplemental material

### **NK cell cytotoxicity is transiently enhanced during acute malaria and modulated by the host microenvironment**

Pengjun Xi<sup>1,2,3</sup>, Patrick A. Sandoz<sup>4,5, #</sup>, Maximilian Julius Lautenbach<sup>1,2,3, #</sup>, Eleni Bilev<sup>6</sup>, Björn Önfelt<sup>4,6</sup>, Anna Färnert<sup>1,2,3</sup>, Quirin Hammer<sup>6,7</sup>, Christopher Sundling<sup>1,2,3,\*</sup>

<sup>1</sup> Division of Infectious Diseases, Department of Medicine Solna, Stockholm, Sweden.

<sup>2</sup> Department of Infectious Diseases, Karolinska University Hospital, Stockholm, Sweden.

<sup>3</sup> Center for Molecular Medicine, Karolinska University Hospital, Stockholm, Sweden.

<sup>4</sup> Department of Applied Physics, Science for Life Laboratory, KTH Royal Institute of Technology, Stockholm, Sweden.

<sup>5</sup> Department of Materials Science and Engineering, Science for Life Laboratory, Uppsala University, Uppsala, Sweden.

<sup>6</sup> Center for Infectious Medicine, Department of Medicine Huddinge, Karolinska Institutet, Stockholm, Sweden.

<sup>7</sup> Institute of Immunology, Christian-Albrecht-University of Kiel, Kiel, Germany.

#Equal contribution

#### **File summary**

Supplemental Table 1. Clinical table of study participants

Supplemental Table 2. Proteins included in GO terms

Supplemental Table 3. Antibodies and reagents' information

Supplemental Figure 1. Gating strategy for NK cell subsets and counts per microliter

Supplemental Figure 2. Comparison between primary infected and previously exposed donors

Supplemental Figure 3. Pictures of NK cells at different stages in the killing assay

Supplemental Figure 4. NK cell killing assay sorting strategy and repeat experiment

Supplemental Figure 5. Recombinant cytokine stimulation assay

Supplemental Figure 6. IgG depletion of pooled malaria plasma

Supplemental Figure 7. Geometric MFI for malaria plasma effect on NK cells

Supplemental Video 1. GrzB-mediated killing (Red)

Supplemental Video 2. Death Ligand-mediated killing (Green)

Supplemental Video 3. Contact types

**Supplemental Table 1. Clinical table of study participants**

|                                                                                         | Flow cytometry<br>Figure 1 (n=14) | Confocal imaging<br>(n=6) | Previously<br>exposed (n=48) | Primary infected<br>(n=24) |
|-----------------------------------------------------------------------------------------|-----------------------------------|---------------------------|------------------------------|----------------------------|
| <b>Age (years)</b>                                                                      |                                   |                           |                              |                            |
| Mean (SD)                                                                               | 34.5 (11.6)                       | 38.8 (21.7)               | 40.8 (8.9)                   | 36.5 (10.8)                |
| Median (Min, Max)                                                                       | 33 (21, 53)                       | 35.5 (18, 75)             | 39 (27, 63)                  | 33 (20, 60)                |
| <b>Gender</b>                                                                           |                                   |                           |                              |                            |
| Male, n (%)                                                                             | 12 (85.7)                         | 4 (66.7)                  | 37 (77.1)                    | 18 (75.0)                  |
| Female, n (%)                                                                           | 2 (14.3)                          | 2 (33.3)                  | 11 (22.9)                    | 6 (25.0)                   |
| <b>CMV serology status</b>                                                              |                                   |                           |                              |                            |
| positive                                                                                | 10 (71.4)                         | 2 (33.3)                  | 43 (89.6)                    | 17 (70.8)                  |
| negative                                                                                | 2 (7.1)                           | 0                         | 1 (2.1)                      | 7 (29.2)                   |
| Unknown                                                                                 | 2 (7.1)                           | 4 (66.7)                  | 4 (8.3)                      | 0                          |
| <b>Sickle cell trait</b>                                                                |                                   |                           |                              |                            |
| AA                                                                                      | 10 (71.4)                         | 2 (33.3)                  | 38 (79.2)                    | 23 (95.8)                  |
| AS                                                                                      | 2 (7.1)                           | 0                         | 6 (12.5)                     | 0                          |
| Unknown                                                                                 | 2 (7.1)                           | 4 (66.7)                  | 4 (8.3)                      | 1 (4.2)                    |
| <b>Born in non-endemic<br/>country, n (%)</b>                                           | 7 (50.0)                          | 1 (17.7)                  | 0 (0.0)                      | 24 (100.0)                 |
| <b>Born in malaria<br/>endemic country (%)</b>                                          | 7 (50.0)                          | 5 (83.3)                  | 48 (100.0)                   | 0 (0.0)                    |
| <b>Self-reported<br/>symptom onset before<br/>acute samples (days)</b>                  |                                   |                           |                              |                            |
| Mean (SD)                                                                               | 3.5 (1.6)                         | 2.6 (0.5)                 | 4.94 (3.47)                  | 4.71 (2.93)                |
| Median (Min, Max)                                                                       | 3 (1,6)                           | 3 (2, 3)                  | 5 (1, 21)                    | 4 (0, 12)                  |
| Missing                                                                                 | 2                                 | 1                         | 1                            | 1                          |
| <b>Cumulative time of<br/>residency in malaria<br/>endemic area (years)</b>             |                                   |                           |                              |                            |
| Mean (SD)                                                                               | 17.6 (13)                         | 26 (0)                    | 25.53 (7.02)                 | 0.59 (1.12)                |
| Median (Min, Max)                                                                       | 18 (0, 39)                        | 26 (26, 26)               | 25 (14, 39)                  | 0 (0, 3)                   |
| Missing                                                                                 | 2                                 | 4                         | 0                            | 0                          |
| <b>Time since permanent<br/>residency in malaria<br/>endemic area (years)</b>           |                                   |                           |                              |                            |
| Mean (SD)                                                                               | 12 (9.7)                          | -                         | 13.39 (11.32)                | -                          |
| Median (Min, Max)                                                                       | 12 (1, 32)                        | -                         | 11.5 (0, 46)                 | -                          |
| Missing                                                                                 | 2                                 | 6                         | 0                            | 0                          |
| <b>Body temperature at<br/>admission (°C)</b>                                           |                                   |                           |                              |                            |
| Mean (SD)                                                                               | 38.28 (1.20)                      | 37.88 (1.35)              | 38.21 (1.23)                 | 38.86 (1.29)               |
| Median (Min, Max)                                                                       | 38.4 (37.7, 39.3)                 | 37.55 (37.1, 40)          | 38.0 (36.2, 40.6)            | 39 (36.1, 40.5)            |
| Missing                                                                                 | 2                                 | 1                         | 0                            | 0                          |
| <b>Leukocytes (WBC) at<br/>admission (x10<sup>9</sup>/L)<br/>(normal range 3.8-8.8)</b> |                                   |                           |                              |                            |
| Mean (SD)                                                                               | 5.3 (2.06)                        | 5.03 (2.20)               | 6.26 (5.53)                  | 4.46 (1.60)                |
| Median (Min, Max)                                                                       | 5.5 (1.4, 8.3)                    | 5.7 (2.9, 6.8)            | 5.25 (1.9, 35.0)             | 4.2 (2.1, 7.5)             |
| Missing                                                                                 | 2                                 | 0                         | 2                            | 0                          |

**Supplemental Table 2**

| Gene Ontology pathway ID                                     |                                              |                                               |                                               |                                              |                                              |
|--------------------------------------------------------------|----------------------------------------------|-----------------------------------------------|-----------------------------------------------|----------------------------------------------|----------------------------------------------|
| GO:0002717                                                   | GO:0032814                                   | GO:0045089                                    | GO:0045824                                    | GO:0050728                                   | GO:0050729                                   |
| positive regulation of natural killer cell mediated immunity | regulation of natural killer cell activation | positive regulation of innate immune response | negative regulation of innate immune response | negative regulation of inflammatory response | positive regulation of inflammatory response |
| Gene ID                                                      |                                              |                                               |                                               |                                              |                                              |
| NECTIN2                                                      | LEP                                          | TNF                                           | TYRO3                                         | TYRO3                                        | CEBPB                                        |
| HLA-E                                                        | GAS6                                         | FADD                                          | LILRB1                                        | GHRL                                         | TSLP                                         |
| KLRD1                                                        | PGLYRP1                                      | MNDA                                          | YTHDF3                                        | LDLR                                         | TNF                                          |
| CD160                                                        | AXL                                          | TYRO3                                         | PARP1                                         | CDH5                                         | IL6                                          |
| IL12B                                                        | IL15RA                                       | NECTIN2                                       | HLA-E                                         | IL2RA                                        | IL6ST                                        |
| IL18RAP                                                      | HLA-E                                        | PTPRS                                         | TRIM21                                        | CCN3                                         | LGALS1                                       |
| CRTAM                                                        | IL15                                         | BPIFB1                                        | TGFB1                                         | SIRPA                                        | LPL                                          |
| PVR                                                          | KLRD1                                        | LBP                                           | KLRD1                                         | ACP5                                         | LILRA5                                       |
| SLAMF6                                                       | IL12B                                        | CD14                                          | LGALS9                                        | PGLYRP1                                      | LDLR                                         |
| STAT5B                                                       | IL18                                         | FCN2                                          | SERPINB9                                      | SOD1                                         | FABP4                                        |
| LAG3                                                         | FGR                                          | CCL5                                          | HAVCR2                                        | PROC                                         | IL1RL1                                       |
|                                                              | HAVCR2                                       | FCRL3                                         | VSIG4                                         | IL4                                          | PLA2G2A                                      |
|                                                              | STAT5B                                       | IRAK1                                         | GRN                                           | IL13                                         | SERPINE1                                     |
|                                                              |                                              | TRIM5                                         | SLAMF8                                        | IL10                                         | LBP                                          |
|                                                              |                                              | HLA-E                                         | GFER                                          | MVK                                          | OSMR                                         |
|                                                              |                                              | MAP2K6                                        | LYAR                                          | SIGLEC10                                     | IL1B                                         |
|                                                              |                                              | IRAK4                                         | MMP12                                         | BCR                                          | IL33                                         |
|                                                              |                                              | PIK3AP1                                       | ARG1                                          | CD200R1                                      | IFNG                                         |
|                                                              |                                              | HEXIM1                                        | CEACAM1                                       | CD200                                        | HLA-E                                        |
|                                                              |                                              | TLR3                                          |                                               | CXCL17                                       | IL15                                         |
|                                                              |                                              | KLRD1                                         |                                               | ADA                                          | OSM                                          |
|                                                              |                                              | CLEC7A                                        |                                               | HGF                                          | LTA                                          |
|                                                              |                                              | CD160                                         |                                               | IL12B                                        | TNFSF11                                      |
|                                                              |                                              | IL12B                                         |                                               | CST7                                         | CCL3                                         |
|                                                              |                                              | HSPA1A                                        |                                               | TREM2                                        | TLR3                                         |
|                                                              |                                              | CD40                                          |                                               | FGR                                          | IL16                                         |
|                                                              |                                              | TREM2                                         |                                               | GSTP1                                        | TNFRSF11A                                    |
|                                                              |                                              | COLEC12                                       |                                               | CX3CL1                                       | IL12B                                        |
|                                                              |                                              | CASP1                                         |                                               | PLA2G10                                      | CTSC                                         |
|                                                              |                                              | IL18RAP                                       |                                               | TNFRSF1B                                     | IL18                                         |
|                                                              |                                              | EREG                                          |                                               | TNFRSF1A                                     | TREM2                                        |
|                                                              |                                              | CRTAM                                         |                                               | GRN                                          | CCL24                                        |
|                                                              |                                              | LY96                                          |                                               | SLAMF8                                       | CASP1                                        |
|                                                              |                                              | PVR                                           |                                               | FCGR2B                                       | CX3CL1                                       |
|                                                              |                                              | ADAM8                                         |                                               | YES1                                         | MMP8                                         |
|                                                              |                                              | CTSS                                          |                                               | LYN                                          | ADAM8                                        |
|                                                              |                                              | HAVCR2                                        |                                               | NPY                                          | APP                                          |
|                                                              |                                              | LILRA2                                        |                                               | MDK                                          | IL17RA                                       |
|                                                              |                                              | NINJ1                                         |                                               | TEK                                          | PLA2G7                                       |
|                                                              |                                              | PQBP1                                         |                                               | NT5E                                         | TNFRSF1A                                     |
|                                                              |                                              | MAVS                                          |                                               | FURIN                                        | GRN                                          |
|                                                              |                                              | BIRC2                                         |                                               | SRC                                          | PARK7                                        |
|                                                              |                                              | RIGI                                          |                                               |                                              | NINJ1                                        |
|                                                              |                                              | CLEC6A                                        |                                               |                                              | CD28                                         |
|                                                              |                                              | SLAMF6                                        |                                               |                                              | STAT5B                                       |
|                                                              |                                              | STAT5B                                        |                                               |                                              | S100A12                                      |
|                                                              |                                              | LAG3                                          |                                               |                                              | CCN4                                         |
|                                                              |                                              | ERBIN                                         |                                               |                                              | MDK                                          |
|                                                              |                                              | LYN                                           |                                               |                                              |                                              |
|                                                              |                                              | MMP12                                         |                                               |                                              |                                              |
|                                                              |                                              | CD300LF                                       |                                               |                                              |                                              |
|                                                              |                                              | SRC                                           |                                               |                                              |                                              |

**Supplemental Table 3****Antibodies used for figure 1**

| <b>Antibodies</b>                   | <b>Clone</b> | <b>Source</b>     | <b>Identifier</b>                   |
|-------------------------------------|--------------|-------------------|-------------------------------------|
| CD8 BUV737                          | SK1          | BD                | Cat# 612754, RRID:AB_2870085        |
| Ki67 BUV395                         | B56          | BD                | Cat# 564071, RRID:AB_2738577        |
| CD56 BU786                          | NCAM16.2     | BD                | Cat# 564058, RRID:AB_2738569        |
| HLA-DR BV605                        | G46-6        | BD                | Cat#562845; RRID:AB_2744478         |
| CD16 BV510                          | 3G8          | BD                | Cat#563830; RRID:AB_2938676         |
| CD57 eFluor450                      | TB01         | Thermo Scientific | Cat#48-0577-42; RRID:AB_2016680     |
| Perforin PerCPCy5.5                 | δG9          | BD                | Cat# 563762, RRID:AB_2738409        |
| FcRy FITC                           | Polyclonal   | Milli-Mark        | Cat# FCABS400F;<br>RRID:AB_11203492 |
| CD3 PE-Cy7                          | UCHT1        | BD                | Cat# 563423, RRID:AB_2738196        |
| CD14 PE-Cy7                         | M5E2         | BD                | Cat# 557742, RRID:AB_396848         |
| CD19 PE-Cy7                         | SJ25C1       | BD                | Cat# 557835, RRID:AB_396893         |
| PLZF PE-CF594                       | R17-809      | BD                | Cat# 565738, RRID:AB_2739339        |
| NKG2C PE                            | S19005E      | Biolegend         | Cat#375004; RRID:AB_2888871         |
| CD38 APC-Fire810                    | HB-7         | Biolegend         | Cat#356644; RRID:AB_2860936         |
| NKG2A APC-Fire750                   | S19004C      | Biolegend         | Cat#375116; RRID:AB_2888866         |
| CD7 R718                            | 4H9          | BD                | Cat# 568384, RRID:AB_3684232        |
| Granzyme B APC                      | QA16A02      | Biolegend         | Cat# 372204, RRID:AB_2687028        |
| CountBright absolute counting beads |              | Thermo Scientific | Cat#C36950                          |

**Antibodies and reagents used for figure 5 and 6**

| <b>Antibodies</b>         | <b>Clone</b>   | <b>Source</b>     | <b>Identifier</b>                   |
|---------------------------|----------------|-------------------|-------------------------------------|
| Viability dye aqua        |                | Thermo Scientific | Cat#L34957;                         |
| CD57, PacificBlue         | HNK-1          | BioLegend         | Cat#359608; RRID:AB_2562459         |
| CD19, BV570               | HIB19          | BioLegend         | Cat#302236; RRID:AB_2563606         |
| CD3, PE-Cy5               | UCHT1          | BioLegend         | Cat#300410; RRID:AB_314064          |
| NKG2C, PE                 | REA205         | Miltenyi          | Cat#130-119-776;<br>RRID:AB_2751835 |
| NKG2A, PE-Vio770          | REA110         | Miltenyi          | Cat#130-113-567;<br>RRID:AB_2726172 |
| CD56, BUV737              | NCAM16.2       | BD                | Cat#612767; RRID:AB_2860005         |
| CD14, BV605               | M5E2           | BioLegend         | Cat#301834; RRID:AB_2563798         |
| CD16, BV785               | 3G8            | BioLegend         | Cat#302046; RRID:AB_2563803         |
| Granzyme B, AlexaFluor700 | GB11           | BD                | Cat#560213; RRID:AB_1645453         |
| Perforin, FITC            | dG9            | BioLegend         | Cat#308104; RRID:AB_314701          |
| IL-1b                     |                | PeptoTech         | Cat#200-01B-10UG                    |
| IL-12                     |                | BioLegend         | Cat#573002                          |
| IL-15                     |                | BioLegend         | Cat#570316                          |
| IL-18                     | E.coli-derived | R&D System        | Cat#9124-IL/CF                      |
| TGF-b1                    |                | PeptoTech         | Cat#100-21-100G                     |
| IgG1 Isotype Antibody     | 11711          | R&D System        | Cat#MAB002; RRID:AB_357344          |

|                   |       |            |                             |
|-------------------|-------|------------|-----------------------------|
| anti-TGF- $\beta$ | 1D11  | R&D System | Cat#MAB1835; RRID:AB_357931 |
| anti-IL12 p70     | 24910 | R&D System | Cat#MAB219; RRID:AB_2123616 |
| anti-IL15         | 34593 | R&D System | Cat#MAB247; RRID:AB_2124578 |

### Reagents used for confirmation of IgG antibody depletion

|                                   | Clone  | Source                              | Identifier                       |
|-----------------------------------|--------|-------------------------------------|----------------------------------|
| Magnetic COOH beads (region 26)   |        | <b>Bio-Rad</b>                      | <b>Cat#MC10026-01</b>            |
| Magnetic COOH beads (region 27)   |        | Bio-Rad                             | Cat#MC10027-01                   |
| Magnetic COOH beads (region 35)   |        | Bio-Rad                             | Cat#MC10035-01                   |
| Magnetic COOH beads (region 44)   |        | Bio-Rad                             | Cat#MC10044-01                   |
| Magnetic COOH beads (region 52)   |        | Bio-Rad                             | Cat#MC10052-01                   |
| Magnetic COOH beads (region 62)   |        | Bio-Rad                             | Cat#MC10062-01                   |
| Zeba spin desalting columns       |        | Thermo Scientific                   | Cat#89882                        |
| Bio-Plex Amine coupling kit       |        | Bio-Rad                             | Cat#171-406001                   |
| EDAC                              |        | Bio-Rad                             | Cat#153-0990                     |
| Sulfo-NHS                         |        | Thermo Scientific                   | Cat#24510                        |
| 96-well microtiter plates         |        | Bio-Rad                             | Cat#171025001                    |
| PE-conjugated Goat Anti-Human IgG |        | Jackson ImmunoResearch Laboratories | Cat#109-116-170; RRID:AB_2337681 |
| Mouse anti-human IgG1 Hinge-PE    | 4E3    | SouthernBiotech                     | Cat#9052-09; RRID:AB_2796621     |
| Mouse anti-human IgG3 Hinge-PE    | HP6050 | SouthernBiotech                     | Cat#9210-09; RRID:AB_2796701     |
| Mouse anti-human IgM Hinge-PE     | SA-DA4 | SouthernBiotech                     | Cat#9020-09; RRID:AB_2796577     |
| Ab SpinTrap                       |        | Cytiva                              | Cat#28403                        |

### Antibodies for immune cell subset profiling (Supplemental figure 2)

| Antibodies            | Clone       | Source            | Identifier                   |
|-----------------------|-------------|-------------------|------------------------------|
| CD14, BB700           | M $\phi$ P9 | BD                | Cat# 566465; RRID:AB_2739737 |
| CD57, BB515           | NK-1        | BD                | Cat#565285; RRID:AB_2739155  |
| gd TCR, PE-Cy7        | 11F2        | BD                | Cat#655410; RRID:AB_2870377  |
| CD38, PE-Cy5          | HIT2        | BD                | Cat#555461; RRID:AB_395854   |
| CD25, PE-CF594        | M-A25       | BD                | Cat#562403; RRID:AB_11151919 |
| Vd2, PE               | b6          | BD                | Cat#555739; RRID:AB_396082   |
| CD3, APC-H7           | SK7         | BD                | Cat#560176; RRID:AB_1645475  |
| CD16, Alexa Fluor 700 | 3G8         | BD                | Cat#560713; RRID:AB_1727430  |
| CCR7, Alexa Fluor 647 | 3D12        | BD                | Cat#557734; RRID:AB_396842   |
| CD56, BV786           | NCAM16.2    | BD                | Cat#564058; RRID:AB_2646835  |
| CD19, BV711           | SJ25C1      | BD                | Cat#563036; RRID:AB_2737968  |
| CD45RA, BV650         | HI100       | BD                | Cat#563963; RRID:AB_2738514  |
| HLA-DR, BV605         | G46-6       | BD                | Cat#562845; RRID:AB_2744478  |
| Aqua LIVE/DEAD        |             | Thermo Scientific | Cat#L34966                   |

|              |            |    |                              |
|--------------|------------|----|------------------------------|
| CD127, BV421 | HIL-7R-M21 | BD | Cat#562436; RRID:AB_11151911 |
| CD8, BUV737  | SK1        | BD | Cat#612754; RRID:AB_2870085  |
| CD4, BUV395  | SK3        | BD | Cat#563550; RRID:AB_2738273  |

---

## Supplemental Figure 1

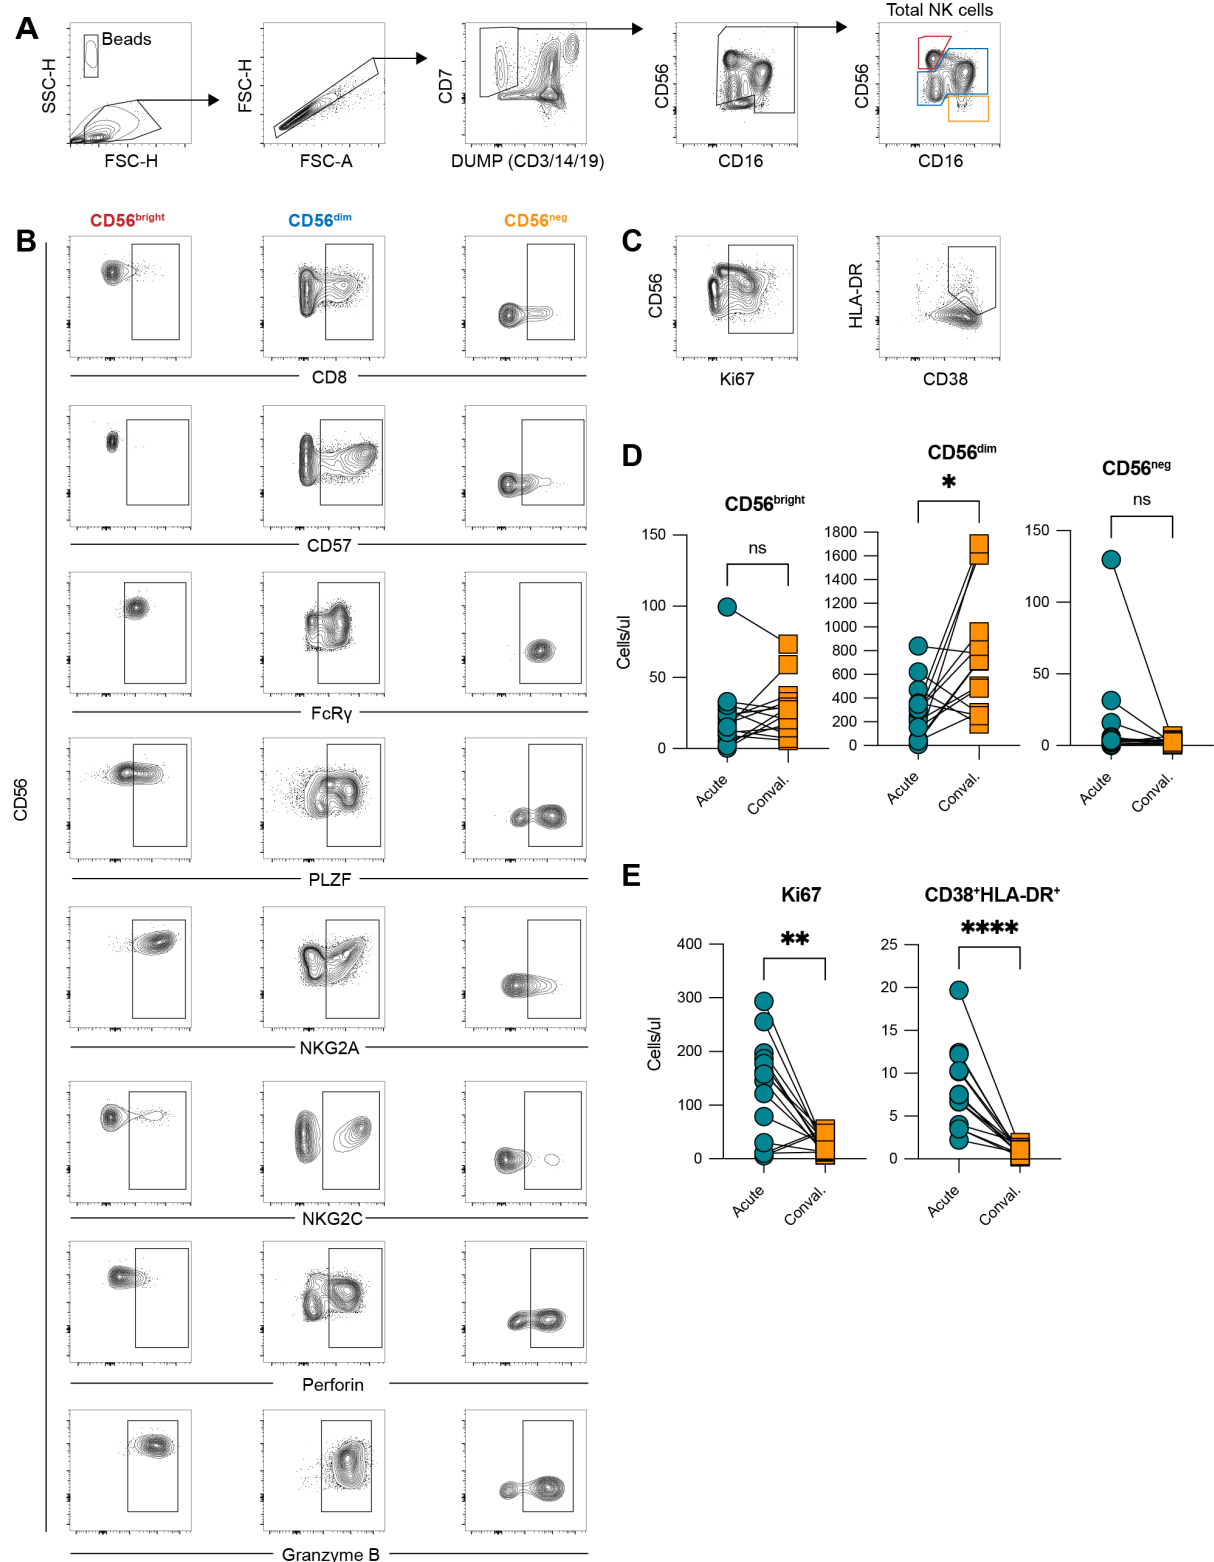

**Supplemental Figure 1. Gating strategy and cell counts.** (A) Gates identifying added cell counting beads and NK cell subsets. (B) Gates for indicated protein markers among CD56<sup>bright</sup> (left), CD56<sup>dim</sup> (middle), and CD56<sup>neg</sup> (right) NK cells. (C) Gates for proliferation (Ki67) and activation (CD38 versus HLA-DR). (D) Cells per  $\mu\text{L}$  calculated using countbright beads for NK cell subsets ( $n=14$ ). (E) Cells per  $\mu\text{L}$  of proliferating and activated total NK cells ( $n=14$ ). *P*-values were calculated between acute and convalescent (12 month) time-points using two-tailed paired students *t*-tests. Significance is

indicated as: ns = not significant,  $p > 0.05$ . A  $p$ -value  $< 0.05$  was considered statistically significant with \* $p < 0.05$ , \*\* $p < 0.01$ , \*\*\* $p < 0.0001$ .

## Supplemental Figure 2

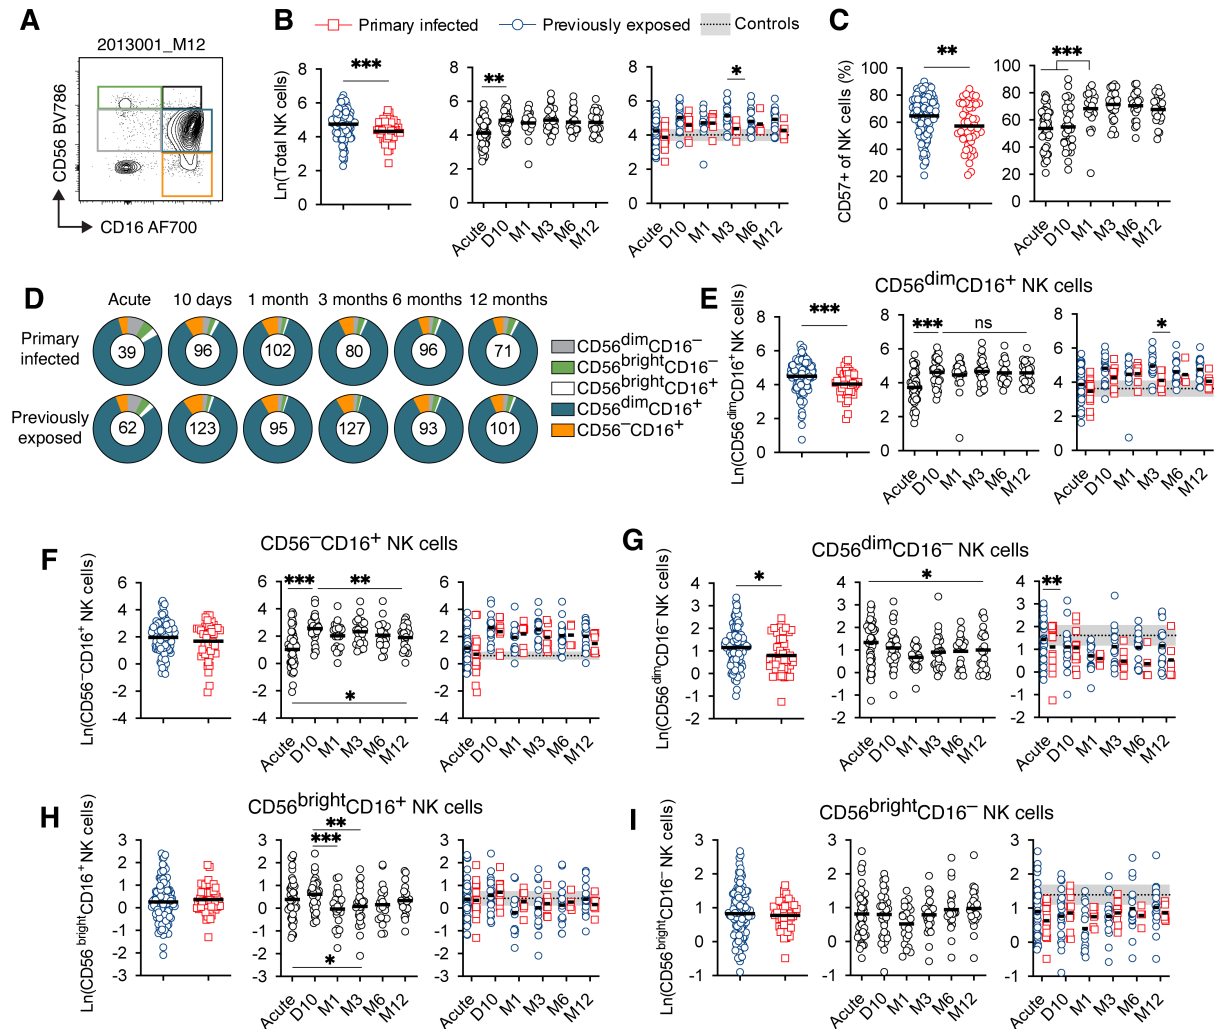

**Supplemental Figure 2. Comparison between primary infected and previously exposed donors following acute malaria.** (A) Representative FACS plot showing gating strategy for NK cell subsets based on CD56 and CD16 expression. (B) Ln Total NK cell counts per 1000 live cells. Left: Comparison between primary-infected (red,  $n = 50$  samples) and previously exposed individuals (blue,  $n = 115$  samples) across all time points. Middle: Longitudinal analysis of total NK cell counts (groups combined;  $n = 24$ -45 samples per time point). Right: Time-course analysis stratified by exposure history. (C) Frequency of CD57<sup>+</sup> NK cells. Left: Combined data across all time points. Right: Longitudinal analysis by exposure group. (D) Proportional contribution of each NK cell subset to the total NK population at each time point and exposure group. Numbers indicate total NK cells per 1000 live cells. (E–I) Longitudinal analysis of individual NK cell subsets (indicating Ln cell number per 1000 live cells): (E) CD56<sup>dim</sup>CD16<sup>+</sup> NK cells, (F) CD56<sup>-</sup>CD16<sup>+</sup> NK cells, (G) CD56<sup>dim</sup>CD16<sup>-</sup> NK cells, (H) CD56<sup>bright</sup>CD16<sup>+</sup> NK cells, and (I) CD56<sup>bright</sup>CD16<sup>-</sup> NK cells. Statistical analyses were performed using unpaired Welch's two-tailed  $t$ -test, or mixed-effects analyses followed by two-tailed  $t$ -tests with correction for multiple testing. Only significant comparisons are shown: A  $p$ -value  $< 0.05$  was considered statistically significant with \* $p < 0.05$ , \*\* $p < 0.01$ , \*\*\* $p < 0.001$ , \*\*\*\* $p < 0.0001$ . Symbols indicate individual donors. The dotted line indicates the mean NK cell count in healthy Swedish donors ( $n = 10$ ), with the shaded area representing the 95% confidence interval.

### Supplemental Figure 3

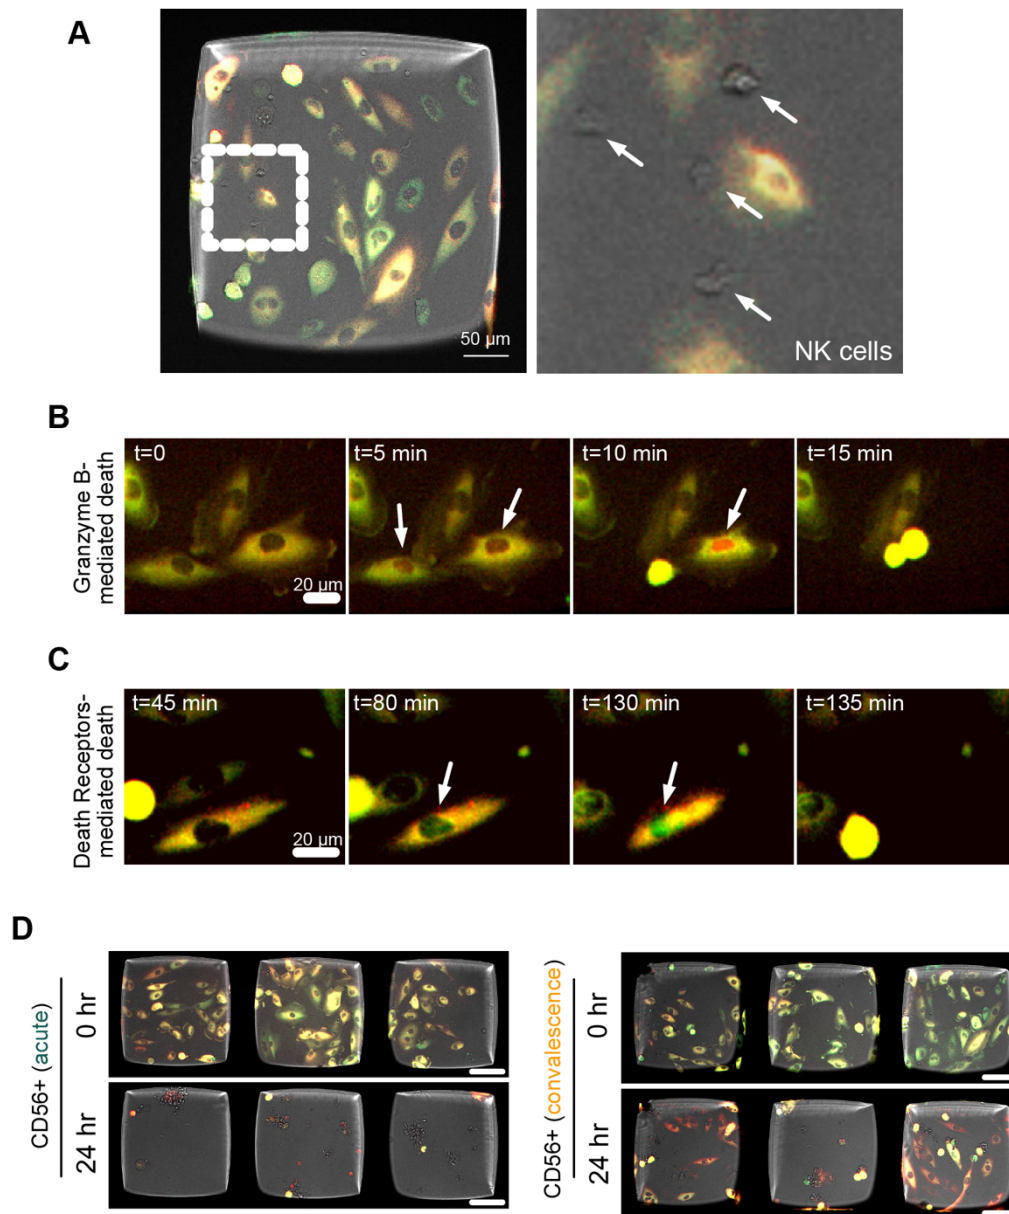

**Supplemental Figure 3. Zoom-in view of confocal microscopy time-lapse killing assay.** (A) A zoom-in view of NK cells (white arrows) and target cells (green/yellow). The left panel shows a microwell with cells. The right panel shows a zoom-in view where NK cells which are unlabeled and transparent, are indicated by arrows. (B) Zoom-in view of how target cells are killed by NK cell using granzyme B (arrows), indicated by the colour changing from unstained to red (mCherry expressed) with time. (C) Zoom-in view of a target cell that is killed by NK cell with death ligands (white arrow), indicated by the colour changing from unstained to green (GFP expressed) with time. (D) A screenshot of three microwells at co-culture initiation (0 hours) and at 24 hours of the experiment. This illustrates the enhanced killing efficiency of acute compared with convalescent NK cells, where target cells remain after 24 hours.

## Supplemental Figure 4

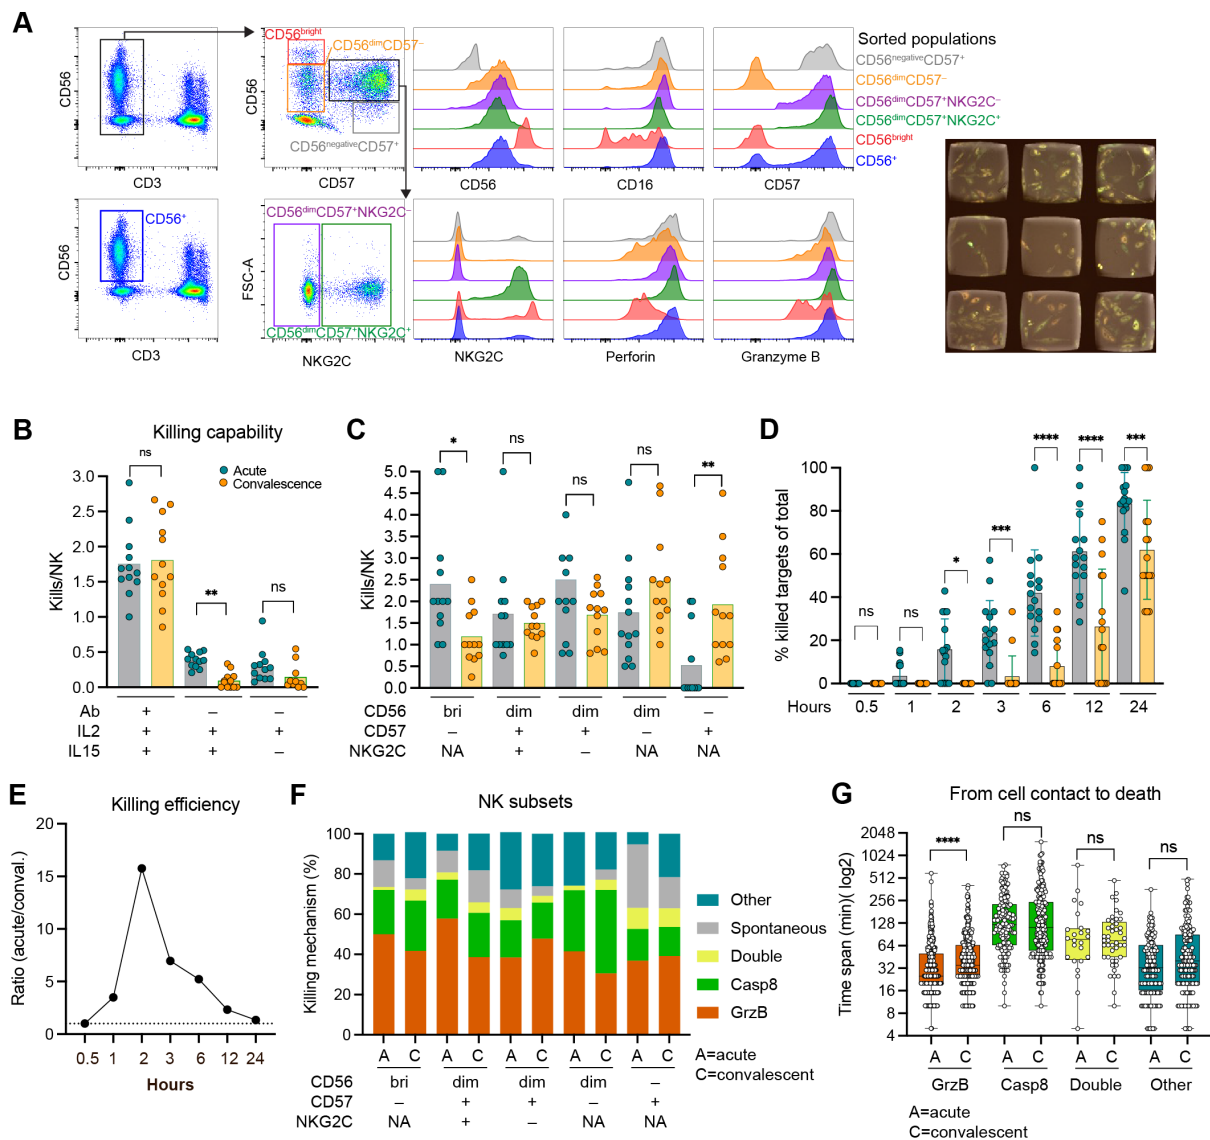

**Supplemental Figure 4. NK cell killing assay sorting strategy and repeat experiment.** (A) Gating strategy to sort total  $CD56^+$  (blue),  $CD56^{bright}CD57^-$  (red),  $CD56^{dim}CD57^-$  (orange),  $CD56^{dim}CD57^+NKG2C^-$  (purple),  $CD56^{dim}CD57^+NKG2C^+$  (green), and  $CD56^-CD57^+$  (grey) NK cells. Middle panel: Histograms indicate protein expression of the indicated markers. Right panel: Representative picture of microwells containing target cells and NK cells. (B) Total  $CD56^+$  NK cell killing capacity when cultured with target cells in the presence or absence of cetuximab (CET), IL15, and IL2 over 2 days ( $n=12$  microwells). (C) Killing capacity of NK cell subsets in the presence of cetuximab antibody, IL15, and IL2 ( $n=12$  microwells). NA indicates that the marker was not assessed during cell sorting. (D) The percentage of target cells killed at different time-points. NK cells from acute malaria in blue and convalescence in orange ( $n=12$  microwells). (E) Killing efficiency calculated as the ratio between kills/NK for acute over convalescence at different time-points. (F) Total  $CD56^+$  NK cell mediated killing mechanism for different NK cell subsets. GrzB indicate granzyme B-mediated and Casp8 indicate caspase 8-mediated. (G) The time in minutes of contact between an NK cell and their target cells associated with the different killing mechanisms. Each dot represents a killing event ( $n=24 - 451$  killing events). Statistical analyses were done for B and C by two-tailed unpaired Student's *t*-tests, and statistical analyses for (D) were done using one-way ANOVA, with  $ns = p > 0.05$ . A *p*-value  $< 0.05$  was considered statistically significant with  $*p < 0.05$ ,  $**p < 0.01$ ,  $***p < 0.001$ ,  $****p < 0.0001$ . (B-H) The second representative donor based on 12 microwells.

## Supplemental Figure 5

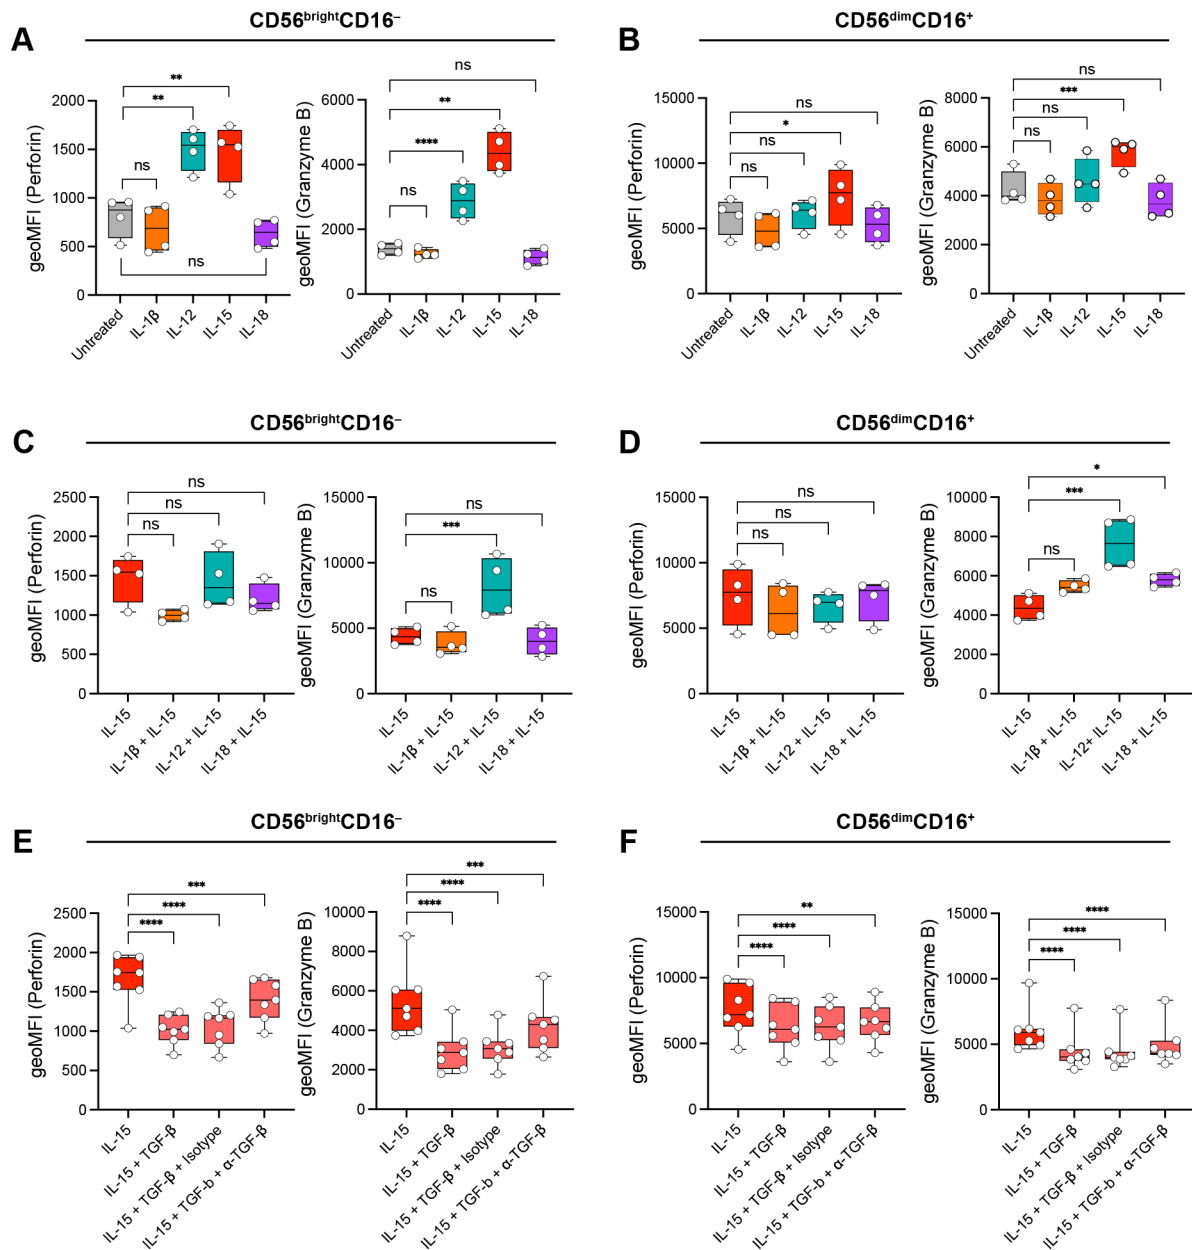

**Supplemental Figure 5. Geometric mean fluorescent intensity for in vitro cytokine stimulation of isolated NK cells from healthy PBMC.** (A-B) Intracellular expression of perforin (left) and granzyme B (right) in (A) CD56<sup>bright</sup>CD16<sup>-</sup> and (B) CD56<sup>dim</sup>CD16<sup>+</sup> NK cells following 24h left untreated (grey) or stimulated with IL-1 $\beta$  (orange), IL-12 (turquoise), IL-15 (red), or IL-18 (purple). Values correspond to geometric mean fluorescent intensity. (C-D) Perforin (left) and granzyme B (right) expression in (C) CD56<sup>bright</sup>CD16<sup>-</sup> and (D) CD56<sup>dim</sup>CD16<sup>+</sup> NK cells following combined cytokine stimulation. (E-F) Perforin (left) and granzyme B (right) expression in (E) CD56<sup>bright</sup>CD16<sup>-</sup> and (F) CD56<sup>dim</sup>CD16<sup>+</sup> NK cells after stimulation with IL-15 alone, IL-15 + TGF- $\beta$ , IL-15 + isotype control, or IL-15 + anti-TGF- $\beta$  antibody. Statistical analyses were done using repeated measures one-way ANOVA with ns =  $p > 0.05$ . A  $p$ -value  $< 0.05$  was considered statistically significant with \* $p < 0.05$ , \*\* $p < 0.01$ , \*\*\* $p < 0.001$ , \*\*\*\* $p < 0.0001$ . Each dot represents one donor ( $n=4-7$ ) with data pooled from three experiments. Results were pooled from three separate experiments including in total 4-7 donors.

## Supplemental Figure 6

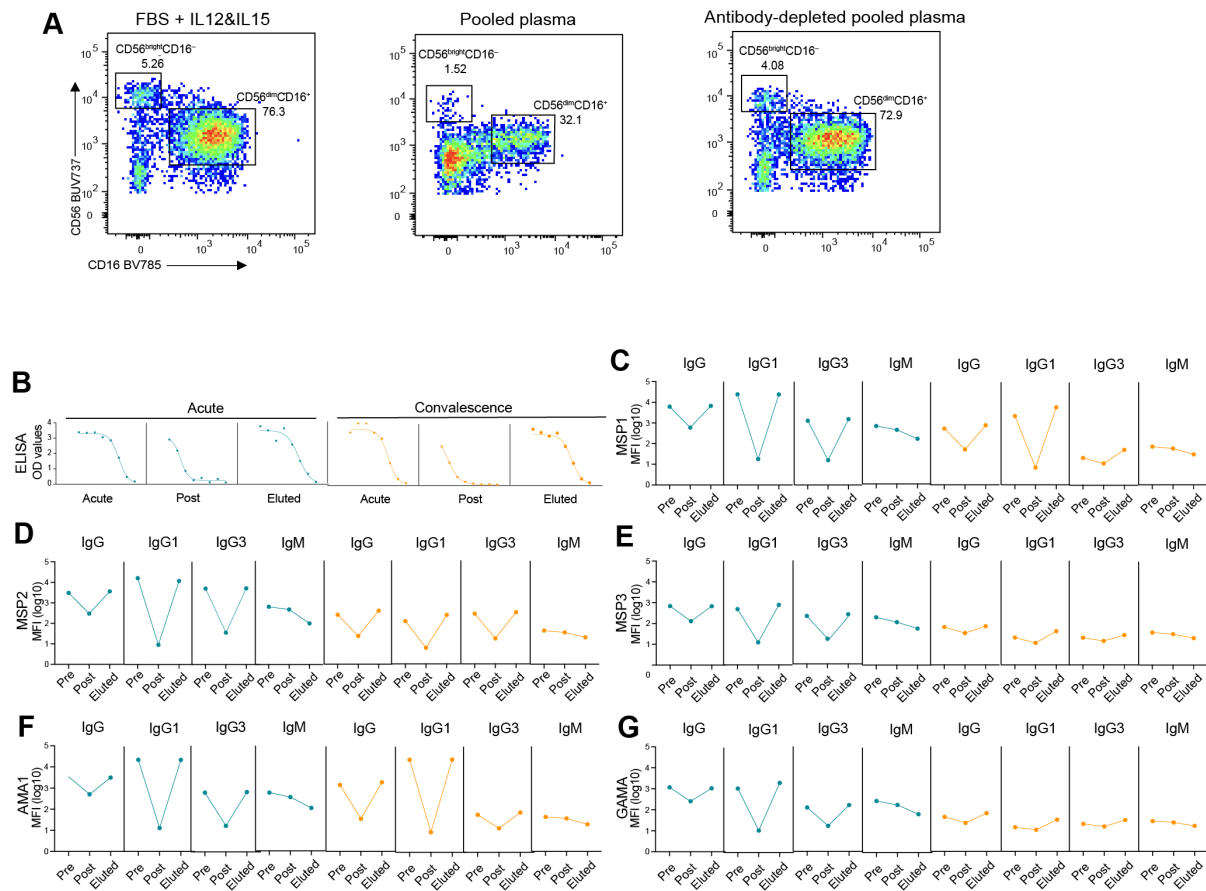

**Supplemental Figure 6. IgG depletion of pooled malaria plasma.** (A) The gating strategy for *in vitro* stimulated CD56<sup>bright</sup>CD16<sup>-</sup> and CD56<sup>dim</sup>CD16<sup>+</sup> NK cells. Left FACS plot indicates NK cells cultured with fetal bovine serum supplemented with IL-12+IL-15, middle panel demonstrates NK cells cultured with 20% pooled plasma (containing IgG), the right panel demonstrates NK cells cultured with 20% pooled plasma where the IgG has been removed. (B) ELISA for total IgG antibodies before (pre) and after (post) removal of IgG from the pooled acute (blue) and convalescent (orange) plasma respectively. (C-G) Multiplex bead-based luminex assay to validate total IgG, IgG1, IgG3 and IgM antibody levels in the pooled acute (blue) and convalescent (orange) plasmas, respectively. This has done to test with five merozoites antigens, (C) MSP1-19, (D) MSP2, (E) MSP3, (F) AMA1 and (G) GAMA. All antigens were derived from *P. falciparum*.

## Supplemental Figure 7

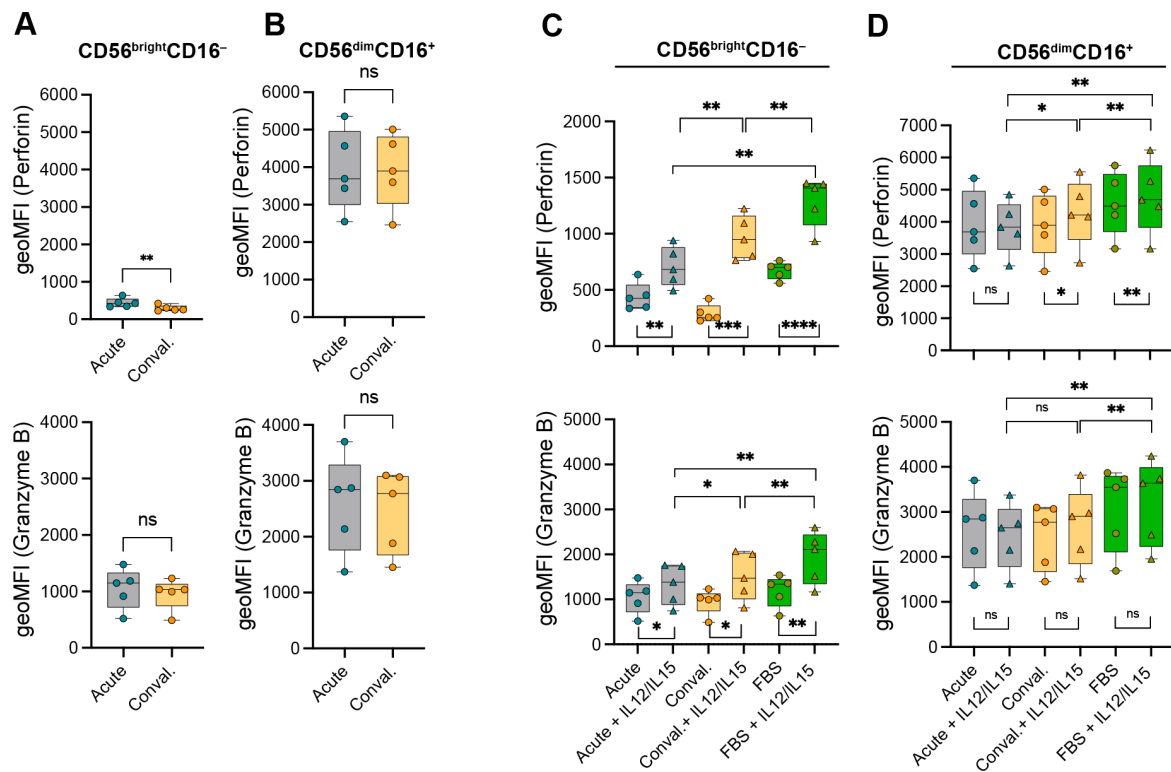

**Supplemental Figure 7. Geometric mean fluorescent intensity for malaria plasma effect on purified NK cells.** (A) Intracellular expression of perforin (top panel) and granzyme B (bottom panel) in (A)  $CD56^{bright}CD16^{-}$  or (B)  $CD56^{dim}CD16^{+}$  NK cells cultured with 20% IgG-depleted pooled plasma from acute (blue) or convalescent (orange) malaria patients. Values correspond to geometric mean fluorescent intensity of the gated population. (C-D) Geometric mean fluorescent intensity for perforin (top) and granzyme B (bottom) expression in (C)  $CD56^{bright}CD16^{-}$  or (D)  $CD56^{dim}CD16^{+}$  NK cells cultured with pooled acute or convalescent plasma or fetal bovine serum (FBS), with or without additional IL-12 and IL-15. Values correspond to geometric mean fluorescent intensity of the gated population. Statistical analyses were performed using two-tailed paired Student's *t*-tests. Significance is indicated as: ns = not significant. A *p*-value < 0.05 was considered statistically significant with \**p* < 0.05, \*\**p* < 0.01, \*\*\**p* < 0.001, \*\*\*\**p* < 0.0001. Experiments were done on cells sorted from 5 separate donors.

## Description of Additional Supplemental video Files

### *File Name: Supplemental Video 1*

Description: Example of granzyme B-mediated killing of A498<sup>GBDR</sup> target cells. Target cells stably express the dual fluorescent reporter NES-ELQTD-GFP-T2A-NES-VGPD-mCherry co-cultured with unlabelled NK cells. Left panel shows the fluorescence of A498<sup>GBDR</sup> cells with mixed GFP (green) and mCherry (red) cytoplasm indicated in yellow. When under attack of an NK cell, the fluorescent reporter is cleaved and mCherry (granzyme B-mediated death) can diffuse into the nucleus, making the nucleus turn from unstained to red. The middle panel is the brightfield of the granzyme B mediated killing, showing small fast moving NK cells. The right panel shows the fluorescence and brightfield merged views of granzyme B-mediated killing.

### *File Name: Supplemental Video 2*

Description: Example of death ligand-mediated killing of A498<sup>GBDR</sup> target cells. Target cells stably express the dual fluorescent reporter NES-ELQTD-GFP-T2A-NES-VGPD-mCherry co-cultured with unlabelled NK cells. Left panel shows the fluorescence of A498<sup>GBDR</sup> cells with mixed GFP (green) and mCherry (red) cytoplasm indicated in yellow. When under attack of an NK cell, the fluorescent reporter is cleaved and GFP (death ligand-mediated death) can diffuse into the nucleus, making the nucleus turn from unstained to green. The middle panel is the brightfield of the death ligand-mediated killing, showing small fast moving NK cells. The right panel shows the fluorescence and brightfield merged views of death ligand-mediated killing.

### *File Name: Supplemental Video 3*

Description: Example of committed contact types of how NK cells contact A498<sup>GBDR</sup> target cells. A498<sup>GBDR</sup> are relatively large with yellow cytoplasm and NK cells are relatively small unlabelled (transparent) cells. Within the video, **A** indicates the migration of an NK cell, where it only has one contact with the target cell. **B** (stable) shows the committed contact, defined as NK cells having contact with target cells more than 2 frames (where 2 frames is approximately 10 min). **C** shows the anchor point contact time where the NK cells (arrow pointed) shaped like an anchor to contact target cells.
